# Supplementary material for: Genome-Wide Association Studies Identify Heavy Metal ATPase3 as the Primary Determinant of Natural Variation in Leaf Cadmium in Arabidopsis thaliana
Source: PLoS Genet. 2012 Sep 6;8(9):e1002923. doi: 10.1371/journal.pgen.1002923 (PMC3435251; doi:10.1371/journal.pgen.1002923)
Supplement: Table S2 — Primers used in this study. (XLSX) [file pgen.1002923.s004.xlsx]

## Sheet: Sheet1
Primer_name	Sequence	Purpose	Restriction Enzyme Applied
HMA2-1L	GGTTTGGCAATCTTTGGTTG	Sequence candidate region
HMA2-1R	GTGAGTAACGCGAGAAGTCG	Sequence candidate region
HMA2-2L	AAATCACTAAATCGCAAGCAGAC	Sequence candidate region
HMA2-2R	GGTAGGCTGCTGCTTCTTTC	Sequence candidate region
HMA2-3L	GGCAGTCCGACAAATAATATCG	Sequence candidate region
HMA2-3R	ATTAAGGGGTGCATGTAACG	Sequence candidate region
HMA2-4L	ATTGCGATGAATGTAGAACG	Sequence candidate region
HMA2-4R	GGAGAAGTATGCCGGAAACC	Sequence candidate region
HMA2-5L	CGTAACGCATCACATTTCAC	Sequence candidate region
HMA2-5R	CTCCAGTCTCTGCAATCACG	Sequence candidate region
HMA2-6L	TGTTCACAATCGCTGAATGG	Sequence candidate region
HMA2-6R	CTGCCTTTGTGAGTGCACAG	Sequence candidate region
HMA2-7L	TTTGTGGCTATCCCATTTGC	Sequence candidate region
HMA2-7R	CATGGCTTGAGCTACACCAG	Sequence candidate region
HMA2-8L	TCTGATGGTTCTTTGCTTTGG	Sequence candidate region
HMA2-8R	GTCCGAACTGGCTTTAGCTG	Sequence candidate region
HMA2-9L	ACTTGAAGGTGATGCTGCTG	Sequence candidate region
HMA2-9R	AATGGGGTTGGGAAGATTTG	Sequence candidate region
HMA3-1L	AAAGTGGTCAAGTGGATGTG	Sequence candidate region
HMA3-1R	TTGGACTTGGAACATTACGC	Sequence candidate region
HMA3-2L	AGCAATCCTTGTTCGTTGTC	Sequence candidate region
HMA3-2R	GAAGATTGGGTCCCCTTCAG	Sequence candidate region
HMA3-3L	GAATTAATATTTGAGTACCTAAGTCG	Sequence candidate region
HMA3-3R	TAGAAGTGGGCTTGTTGCAG	Sequence candidate region
HMA3-4L	ATAACACGGGTCCCTCTCTG	Sequence candidate region
HMA3-4R	ACATGGGAGCAAAACTGACC	Sequence candidate region
HMA3-5L	GGCAATAGCTCTGCTTCACC	Sequence candidate region
HMA3-5R	AGCATGTTTTGCGGTAATCC	Sequence candidate region
HMA3-6L	GGCTGCCTTAGTGAGAGCAC	Sequence candidate region
HMA3-6R	CTCAGTTGCAGATTGGCTTG	Sequence candidate region
HMA3-7L	GGCGCTAAGCTCATCAGTG	Sequence candidate region
HMA3-7R	TTGGAATCTGCTGTTCATCG	Sequence candidate region
HMA3-8L	CGAAAGTCAAAACGTCGATTG	Sequence candidate region
HMA3-8R	AATGGAAACTGCGGTCAGAG	Sequence candidate region
HMA3-9L	GAGCCTATTGGGCCATAACA	Sequence candidate region
HMA3-9R	TTTTATAGCTGCGTGGGACA	Sequence candidate region
HMA2Exp-L	GTTCCGTCAAGAACCGTCAT	Sequence candidate region
HMA2Exp-R	GAGAAGTATGCCGGAAACCA	Sequence candidate region
HMA3Exp-L	GGAATCCAAACTGCAATGCT	Sequence candidate region
HMA3Exp-R	GTGCATCGTTAAGCCCATCT	Sequence candidate region
Fo13MF	ACGAGGTCATCGGAAAATCA	Molecular Marker	Taq I
Fo13MR	AAAACCAACCGTCGTCTCAG	Molecular Marker	Taq I
Fo14MF	CAAGATCAAAGCCCTTCCAA	Molecular Marker	Taq I
Fo14MR	TTTGAGCTCTGTTGGCATTG	Molecular Marker	Taq I
Fo14.5MF	ATCCCTGCTTCACATTGACC	Molecular Marker	Alu I
Fo14.5MR	AACGACAGGGAGGACACAAG	Molecular Marker	Alu I
Fo15MF	TCAGTCTCCTGCCAATGTGA	Molecular Marker	Taq I
Fo15MR	TTCCTCTGTGGAACCAAATG	Molecular Marker	Taq I
Fo16MF	GCTTCACCGAGCTACCAAAG	Molecular Marker	Taq I
Fo16MR	AGCTCCTCCAACGCAGTTTA	Molecular Marker	Taq I
HMA3GU	GTCGACTCAAGAGAGAAAACGATGAAGCCAAGAA	Complementation vector construction	Sal I
HMA3GL	GGATCCAAAAAGGACTTGCATTTCGGTTCAACTC	Complementation vector construction	BamH I
HMA2GU	GTCGACCTGCATTGTGGCCTATAATTGAATCTGG	Complementation vector construction	Sal I
HMA2GL	GGATCCAGACGTAGGAAATGGCATTCGAAGGTAG	Complementation vector construction	BamH I
HMA3QF	TGCTGCTCATAAGGCAAGCA	qRT-PCR
HMA3QR	CTAGTCCAGTATCCGCGATCACT	qRT-PCR
UBCF	CTGCGACTCAGGGAATCTTCTAA	qRT-PCR
UBCR	TTGTGCCATTGAATTGAACCC	qRT-PCR
